1 **Title: Dual brain cortical calcium imaging reveals social interaction-**  
2 **specific correlated activity in mice.**

3 Abbreviated title: Imaging inter-mouse brain synchronization

4 Nicholas J. Michelson<sup>1,2</sup>, Federico Bolaños<sup>1,2</sup>, Luis A. Bolaños<sup>1,2</sup>, Matilde Balbi<sup>1,2</sup>, Jeffrey M.  
5 LeDue<sup>1,2</sup>, and Timothy H. Murphy<sup>1,2,\*</sup>

6 1 Department of Psychiatry, Kinsmen Laboratory of Neurological Research;  
7 2 Djavad Mowafaghian Centre for Brain Health, University of British Columbia,  
8 Vancouver, British Columbia, Canada, V6T 1Z3;  
9

10 Contributions: F.B., L.B., M.B., N.J.M., and T.H.M. performed animal experiments. F.B., T.H.M.,  
11 N.J.M. and J.M.L. wrote the paper. F.B., L.B., J.M.L., and T.H.M. developed the hardware and  
12 software for the apparatus. F.B., N.J.M., and J.M.L wrote the analysis. L.B., F.B., N.J.M., and  
13 J.M.L drew models and figures.

14 \*Correspondence to: Timothy H Murphy [thmurphy@mail.ubc.ca](mailto:thmurphy@mail.ubc.ca)

15 Number of figures: 5

16 Tables 1

17 1 video

18

19

20 Acknowledgements: We thank Pumin Wang for help with surgery and Matthieu P. Vanni, Allen  
21 W. Chan, Dongsheng Xiao and Alexander McGirr for helpful discussion and comments.

22 Competing financial interests: authors report no conflict of interest. Funding sources: This work  
23 was supported by a Canadian Institutes of Health Research (CIHR) T.H.M FDN-143209 and from  
24 Brain Canada for the Canadian Neurophotonics Platform to THM and the Brain Canada Multi-  
25 Investigator Research Initiative program that THM was part of. CIHR or Brain Canada had no  
26 involvement in the research or decision to publish. This work was supported in part by funding  
27 provided by Brain Canada, in partnership with Health Canada, for the Canadian Open  
28 Neuroscience Platform initiative.

29

30

31 **Abstract**

32 We employ cortical mesoscale calcium-imaging to observe brain activity in two head-fixed mice  
33 in a staged social touch-like interaction. Using a rail system, mice are brought together to a  
34 distance where macrovibrissae of each mouse make contact. Cortical signals were recorded  
35 from both mice simultaneously before, during, and after the social contact period. When the  
36 mice were together, we observed bouts of mutual whisking and cross-mouse correlated cortical  
37 activity in the vibrissae cortex. This correlated activity was specific to individual interactions as  
38 the correlations fell in trial-shuffled mouse pairs. Whisk-related global GCAMP6s signals were  
39 greater in cagemate pairs during the together period. The effects of social interaction extend  
40 outside of regions associated with mutual touch and had global synchronizing effects on cortical  
41 activity. We present an open-source platform to investigate the neurobiology of social  
42 interaction by including mechanical drawings, protocols, and software necessary for others to  
43 extend this work.

44

45

46 **Keywords:** mouse, cortex, social interaction, GCAMP, mesoscale, whisker

47

48

## 49 Introduction

50 The power of social interaction and touch is undisputed across the animal kingdom. In  
51 many animals, the presence of a conspecific partner may elicit competitive behavior,  
52 reproductive arousal, fear, or other attention-demanding states. Traversal of a social interaction  
53 requires each subject to dynamically integrate its internal state and previous experiences with  
54 the behavior of its partner and other environmental variables (P. Chen & Hong, 2018).  
55 Simultaneously recording neural activity from two individuals engaged in social interaction  
56 (Montague et al., 2002) revealed that interacting humans exhibit correlated neural activity  
57 (Funane et al., 2011; Liu et al., 2017). Interestingly, this emergent property seems to convey  
58 information regarding the context or development of the interaction (Dikker et al., 2017; Jiang et  
59 al., 2015; Yang, Zhang, Ni, De Dreu, & Ma, 2020).

60 Later experiments in mice and bats observed inter-animal neural synchronization at  
61 cellular and circuit-level scales, using optical and electrical recording methodologies (Kingsbury  
62 et al., 2019; Zhang & Yartsev, 2019). In the mouse prelimbic cortex, single neurons were shown  
63 to encode specific self-initiated and partner-initiated competitive social behaviors; and the  
64 degree of synchronization between neuronal network activity in each animal was correlated with  
65 rank differences in the social dominance hierarchy (Kingsbury et al., 2020). Other studies have  
66 shown that prelimbic cortex activity directly modulates social dominance status (Wang et al.,  
67 2011; Zhou et al., 2017).

68 Many circuits throughout the brain shape different aspects of social behavior (Dölen,  
69 Darvishzadeh, Huang, & Malenka, 2013; Gunaydin et al., 2014; B. Guo et al., 2019; Rogers-Carter  
70 et al., 2018; Sych, Chernysheva, Sumanovski, & Helmchen, n.d.; Tschida et al., 2019; Walsh et al.,

71 2018; Zhou et al., 2017). Given the complex motivational and decision-making states involved  
72 with social interaction, it follows that the neural representation of social information may be  
73 widespread and distributed throughout the brain similar to other phenomena (Allen et al., 2019,  
74 2017; Pinto et al., 2019; Steinmetz, Zátka-Haas, Carandini, & Harris, 2019). For example, in  
75 rodents, information regarding the sex of a conspecific partner is represented in many areas  
76 (Ebbesen, Bobrov, Rao, & Brecht, 2019), including prelimbic cortex (Kingsbury et al., 2020),  
77 whisker somatosensory cortex (Bobrov, Wolfe, Rao, & Brecht, 2014), and medial amygdala (Li et  
78 al., 2017). Moreover, basic sensory signaling is modulated during a social context (Cohen,  
79 Rothschild, & Mizrahi, 2011; Lenschow & Brecht, 2015).

80 Investigation of the macro-scale organization of neural dynamics during social interaction  
81 therefore represents an important step forward in understanding the social brain. Widefield  
82 cortical calcium imaging provides an opportunity to observe neural activity across the entire  
83 dorsal cortex *in vivo* (Clancy, Orsolic, & Mrsic-Flogel, 2019; Gilad & Helmchen, 2020; Musall,  
84 Kaufman, Juavinett, Gluf, & Churchland, 2019; Pinto et al., 2019; Vanni, Chan, Balbi, Silasi, &  
85 Murphy, 2017; Xiao et al., 2017), but its application to social neuroscience is largely unexplored  
86 (MacDowell & Buschman, 2020). In this work, we present a paradigm where multi-subject cortical  
87 functional GCaMP imaging is employed during staged interactions between mice. We also  
88 provide detailed resources to help investigators set up inexpensive mesoscale cortical GCaMP  
89 imaging rigs suitable for dual mouse brain imaging. We find that face to face interactions  
90 between mice synchronize cortical activity over wide-scales and this phenomenon is not limited  
91 to regions primarily processing whisker/touch dependent signals.

92

## 93 **Methods**

### 94 *Animals and experimental considerations*

95 All procedures were approved by the University of British Columbia Animal Care  
96 Committee and conformed to the Canadian Council on Animal Care and Use guidelines and  
97 reported according to the ARRIVE guidelines. Transgenic GCaMP6s tetO-GCaMP6s x CAMK tTA  
98 (Wekselblatt, Flister, Piscopo, & Niell, 2016) were obtained from the Jackson Laboratory. All mice  
99 used in this study were males >60 days of age and housed in social housing (n=15 mice up to 4  
100 mice/cage from 6 cages) with 12-h light/12-h dark cycles and free access to food and water. We  
101 did not employ female mice or male and female mouse pairs because of potential for variation  
102 across the estrous cycle that may alter social behavior.

### 103 *Surgical procedure*

104 Chronic windows were implanted on male mice that were at least 8 weeks old, as  
105 previously described in (Silasi, Xiao, Vanni, Chen, & Murphy, 2016). Fur and skin were removed  
106 from the dorsal area of the head, exposing the skull over the entire two dorsal brain hemispheres.  
107 After cleaning the skull with a phosphate buffered saline solution, a titanium head-fixing bar was  
108 glued to the skull above lambda (Figure 1a) and reinforced with clear dental cement (Metabond).  
109 A custom cut coverslip was glued with dental cement on top of the skull (Figure 1a), with the  
110 edges of the window reinforced with a thicker mix of dental cement similar to the procedure of  
111 (Silasi et al., 2016). Mice recovered for at least seven days prior to imaging or head-fixation.

### 112 *Social Dominance Measurements*

113 Social rank was estimated using the tube-test assay (Fan et al., 2019). Briefly, mice were  
114 introduced to either end of a narrow plexiglass tube (32cm long, 2.5cm inner diameter). Upon  
115 meeting in the middle, mice compete by pushing each other to get to the opposite side. The  
116 mouse which pushes the other back out of the tube is deemed the winner. All combinations of  
117 mice within a cage were tested in a round robin format to determine the linear dominance  
118 hierarchy. Tube test tournaments were repeated weekly to assess stability of the hierarchy.

### 119 *Social Interaction Experiments*

120 Two Raspberry Pi imaging rigs were set up facing each other, and initially separated by 14  
121 cm. A parts list and assembly instructions for the Raspberry Pi widefield imaging rig are included  
122 in the supplementary information. One imaging rig was placed atop a translatable rail (Sherline  
123 5411 XY Milling Machine Base), which was driven by a stepper motor to bring the mouse  
124 (hereafter referred to as the moving mouse) into the proximity of the other mouse (stationary  
125 mouse, 6-12 mm inter-snout distance) (see Table 1 and supplemental build guide for details).  
126 Thus, we imaged dorsal cortical activity from two head-restrained mice simultaneously, while  
127 varying the distance between snouts (Figure 1b-c, Supplemental Video 1). Mice were habituated  
128 to the system for at least one week prior to conducting experiments by head-fixing the animals  
129 each day and performing all procedures (e.g. translation, imaging) without the presence of the  
130 other mouse.

131 The entire imaging system was housed inside a box lined with acoustic foam, thereby  
132 reducing ambient light and noise. Throughout the experiment, audio recordings were obtained  
133 at 200 kHz using an ultrasonic microphone (Dodotronic, Ultramic UM200K) positioned within the

134 recording chamber approximately 5cm from each mouse's snout. Audio recordings were  
135 analyzed for ultrasonic vocalizations using the MATLAB toolbox DeepSqueak (Coffey, Marx, &  
136 Neumaier, 2019).

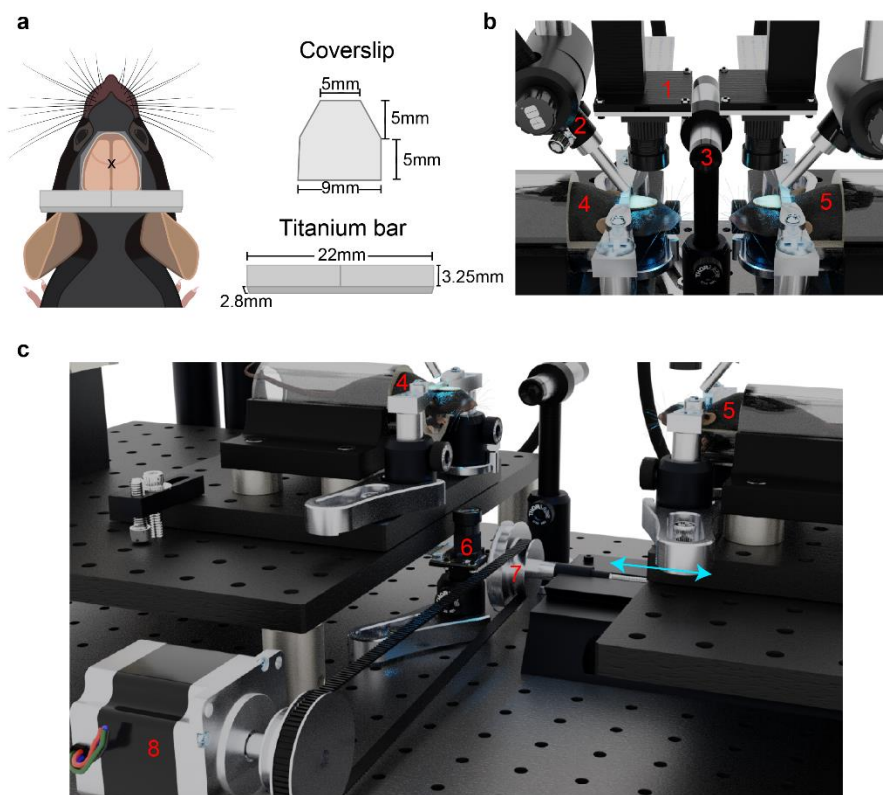

137  
138 **Figure 1. Setup for dual mouse brain imaging system.** A) Cartoon depiction of surgical  
139 preparation for transcranial mesoscale imaging, with custom cut coverslip and titanium bar for  
140 head fixation. B) Close-up view of mouse positioning during the interaction phase of the  
141 experiment. C) Larger field of view render of the imaging system. Numbered components are as  
142 follows: 1) Raspberry Pi brain imaging camera; 2) GCaMP excitation and hemodynamic  
143 reflectance LED light guide; 3) ultrasonic microphone; 4) stationary mouse; 5) moving mouse; 6)  
144 Raspberry Pi infrared behavior camera; 7) stage translation knob; 8) stepper motor with belt  
145 controlling stage translation. Blue arrows indicate direction of motion of the translatable rail.

146

147 *Behavior Imaging*

148           The experimental setup was illuminated with an infrared (850 nm) light emitting diode  
149 (LED) and behaviors were monitored using an infrared Raspberry Pi camera (OmniVision, OV5647  
150 CMOS sensor). Behavior videos were captured at a framerate of 90 frames per second (fps) with  
151 a resolution of 320x180 pixels. The camera was positioned such that the stationary mouse was  
152 always included in the field of view and both mice were clearly visible when they were together  
153 (Figure 2a).

154

#### 155 *GCaMP Image Acquisition*

156           GCaMP activity was imaged using Raspberry Pi Cameras (OmniVision OV5647 CMOS  
157 sensor) equipped with a triple-bandpass filter (Chroma 69013m). The lens on the camera has a  
158 focal length of 3.6mm with a field of view of  $\sim 10.2 \times 10.2$ mm, leading to a pixel size of  $\sim 40$  microns.  
159 24-bit RGB images of GCaMP activity and reflectance were captured at  $\sim 30$ fps and 256x256  
160 resolution. The three cameras (2 brain and 1 behavior) were configured such that one camera  
161 was used to start the acquisition of the other two. Each cortex was illuminated using two LEDs  
162 simultaneously, where one light source (short blue, 447.5 nm Royal Blue Luxeon Rebel LED SP-  
163 01-V4 with Thorlabs FB 440-10 nm band pass filter) provides information about hemodynamic  
164 changes during the experiment (Xiao et al., 2017), and the other light source (long blue, 470nm  
165 Luxeon Rebel LED SP-01-B6 with Chroma 480/30 nm) excites GCaMP. The LEDs were turned on  
166 and off using a transistor-transistor logic (TTL) output from an isolated pulse stimulator (AM-  
167 Systems Model 2100) which was triggered immediately after the start of each experiment. This  
168 sudden change in illumination was used during post-hoc analysis to synchronize frames across  
169 cameras. With the current recording setup, the Raspberry Pi cameras occasionally drop frames



170 as a result of writing the data to the disk. We identified the location of dropped frames by tagging  
171 each frame with a timestamp and found that consecutive frames were rarely dropped. Given the  
172 small number of dropped frames, and the relatively slow kinetics of GCaMP6s (T.-W. Chen et al.,  
173 2013), the lost data was estimated by interpolating the signal for each pixel, thus preserving the  
174 temporal resolution.

### 175 *GCaMP Image Processing*

176 Image pre-processing was conducted with Python using a Jupyter Notebook (Kluyver et  
177 al., 2016). Further analysis was conducted using MATLAB (MathWorks, Natick MA, USA). Green  
178 and blue channels, which contain the GCaMP6s fluorescence and the blood volume reflectance  
179 signals respectively (Ma et al., 2016; Valley et al., 2020; Wekselblatt et al., 2016), were converted  
180 to  $\Delta F/F_0$ . The baseline image, estimated as the mean image across time for the entire recording,  
181 was subtracted from each individual frame ( $\Delta F$ ). The result of this difference was then divided by  
182 the mean image, yielding the fractional change in intensity for each pixel as a function of time  
183 ( $\Delta F/F_0$ ).

184 To correct for hemodynamic artifacts, blue light (440+/-5nm) reflectance  $\Delta F/F_0$  was  
185 subtracted from the green fluorescence  $\Delta F/F_0$ . In this way, small changes in the brain reflectance  
186 due to blood volume changes do not influence the epifluorescence signal. While we acknowledge  
187 that a green reflectance strobing and model-based correction may be advantageous (Ma et al.,  
188 2016), certain technical aspects of the Raspberry Pi camera (which is needed to perform this  
189 experiment due to its small form factor) such as its rolling shutter and inability to read its frame  
190 exposure clock prevent this method from being implemented. The short blue wavelength

191 (440nm) is close to an oxy/deoxygenated hemoglobin isobestic point, and the reflected light  
192 signal correlates well with the green reflectance signal (Xiao et al., 2017), suggesting that this  
193 method effectively captures signal changes resulting from hemodynamic activity. Moreover,  
194 hemodynamic changes are relatively small compared to the signal-noise-ratio of GCaMP6s (Dana  
195 et al., 2014).

196 Occasionally, noisy extreme pixel values for  $\Delta F/F_0$  were observed due to imaging near the  
197 edge of the window or due to the ratio-metric calculation of the  $\Delta F/F_0$ . To reduce their  
198 contribution, pixels exceeding a threshold value were set to be equal to the threshold, thereby  
199 reducing artifacts from smoothing or filtering that might result from inclusion of aberrantly large  
200  $\Delta F/F_0$  values. The threshold was set at the mean  $\pm$  3.5x the standard deviation of each pixel's  
201 time-series for GCaMP data, and at 15%  $\Delta F/F_0$  for the reflectance data (which is larger than  
202 expected reflectance signal values). The  $\Delta F/F_0$  signal was then smoothed with a Gaussian image  
203 filter ( $\sigma=1$ ) and filtered using a 4th order Butterworth bandpass filter (0.01-12.0Hz) (Vanni &  
204 Murphy, 2014).

### 205 *Behavior Quantification*

206 To extract behavior events, a region of interest (ROI) was manually drawn on the behavior  
207 video over each mouse's whiskers and forelimbs (Figure 2a). The motion energy within each ROI  
208 was calculated by taking the absolute value of the temporal gradient of the mean pixel value  
209 within the ROI. The resulting motion energy was smoothed via convolution with a Gaussian kernel  
210 ( $\sigma=5$  frames) and a threshold was established at the mean + 1 standard deviation to detect  
211 behaviors. This analysis captured whisker and forelimb movements for the stationary mouse for

212 the entirety of the experiment, and for the moving mouse only during the interaction phase  
213 (Figure 2c).

#### 214 *Inter-brain correlation analysis*

215 Correlation across brains was calculated using the Pearson's correlation coefficient (PCC).  
216 To compare correlations across trial phases, the inter-brain PCC was calculated for a one-minute  
217 period during initial-separate, together, and final-separate trial phases. Global signals were  
218 calculated as the median  $\Delta F/F_0$  across the entire dorsal cortex, whereas individual regions were  
219 selected from coordinates with respect to bregma according to the Allen Institute brain atlas, and  
220 the corresponding time-series data was calculated as the mean activity within a 5x5 pixel area  
221 surrounding each region location. Time-varying coherence between global signals was estimated  
222 with multitaper methods over a 45 second window with 22.5 second overlap using the Matlab  
223 Chronux toolbox with a time-bandwidth product of 5 and a taper number of 9 (Bokil, Andrews,  
224 Kulkarni, Mehta, & Mitra, 2010; Mitra & Bokil, 2009).

#### 225 *Whisker triggered event analysis*

226 Calcium activity surrounding whisk-initiation events ( $\pm 1s$ ) were extracted from each  
227 whisk event and averaged across events per trial. Whisk events were excluded if any of the  
228 following conditions were met: 1) they occurred coincidentally with forelimb movements, 2) they  
229 occurred within 1 second of the previous whisk event, or 3) total duration exceeded 0.5 seconds.  
230 Self-initiated whisking activity therefore refers to averaged calcium activity of mouse A

231 surrounding whisk events initiated by mouse A, whereas partner-initiated maps refer to averaged  
232 calcium activity of mouse A surrounding whisk events initiated by mouse B.

### 233 *Statistics*

234 Statistical tests were conducted with MATLAB. All data were tested for normality using a  
235 Kolmogorov-Smirnov test prior to subsequent statistical analyses. Correlation values were  
236 transformed using Fisher's z-transformation. Comparisons between two groups were conducted  
237 using two-tailed t-tests for parametric data and Wilcoxon signed rank tests for non-parametric  
238 data. Comparisons between trial phases were assessed using a repeated measures ANOVA with  
239 post-hoc Bonferroni correction for multiple comparisons. All statistically significant results were  
240 observed on the GCaMP signals alone as well as the hemodynamic corrected signals.

### 241 *Resource Availability*

242 Resources to assist in building cortex-wide GCaMP imaging systems, including parts lists,  
243 assembly instructions, and CAD files are available in the supplemental information and at the  
244 Open Science Framework project entitled Dual Brain Imaging. Code for image acquisition,  
245 preprocessing, and analysis are available at the University of British Columbia's Dynamic Brain  
246 Circuits in Health and Disease research cluster's GitHub  
247 (<https://github.com/ubcbraincircuits/dual-mouse>). Data are available in the Federated Research  
248 Data Repository at <https://doi.org/10.20383/101.0303>.

## 249 **Results**

250 *Mice Exhibit Correlated Bouts of Behavior During Social Interaction*

251 Forelimb and whisker movements were monitored for each mouse to measure behavior  
252 (Figure 2A) using a camera positioned underneath the interacting mice (Figure 1C). The stationary  
253 mouse's behavior was captured throughout the entire experiment, while the moving mouse's  
254 behavior acquisition was limited to the social interaction period only (Figure 2B). . Bouts of  
255 forelimb and whisker movements often occur simultaneously (Figure 2C), and the amount of time  
256 spent actively moving whiskers or forelimbs, expressed as percentage of time spent behaving in  
257 each trial phase, did not change between the separate period and the interaction period (Figure  
258 2C, n=33 trials, 14.1+/-3.4% whisking separate vs 14.4+/-4.3% whisking interaction, and 8.9+/-  
259 3.8% forelimb separate vs 9.8+/-4.8% forelimb interaction period, n=33 trials, p=0.77, paired t-  
260 test). The total number of behavior events did not differ across trial phases (Supplemental figure  
261 1a-b). Behavior periods across mice exhibited temporal coordination, as shown by the peak in  
262 the cross-correlation of binary behavior vectors at time lag 0s (Figure 2D black). This temporal  
263 relationship was compared with the cross-correlation of the two behavior vectors measured from  
264 the stationary mouse during the separate phases of the experiment (Figure 2D, red). The  
265 correlation at 0 lag was significantly greater for the inter-animal behaviors compared to the two  
266 separate epochs from the stationary mouse (Figure 2d, n=33 trials, 0.32 +/- 0.11 together vs 0.17  
267 +/- 0.11 separate, p=6.1x10<sup>-8</sup>, paired t-test), as well as any other combination of epochs that  
268 included at least one separated period (Supplemental figure 1c). Intersection over union for the  
269 two behavior vectors (a measure of shared behavior) was significantly greater across animals  
270 than across the separate epochs (Figure 2e, n=33 trials, 0.19 +/- 0.09 together vs 0.09+/-0.07  
271 separate, p=1x10<sup>-6</sup>, paired t-test).

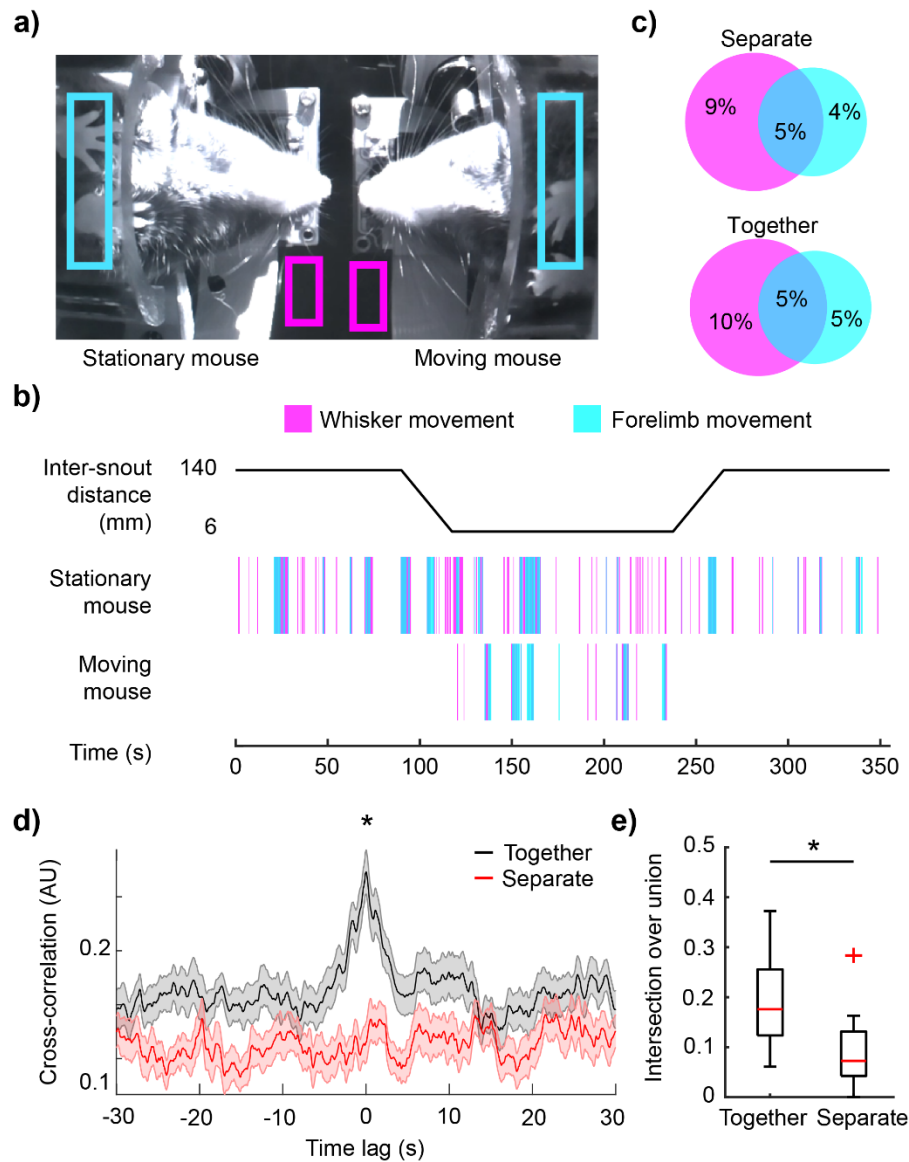

272  
273

274 **Figure 2. Mice coordinate behavior during interaction.** A) Example image of both mice during  
275 the interaction phase of the experiment. Regions over each mouse's whiskers and forelimbs are  
276 shown in magenta and cyan boxes, respectively, to estimate motion. B) Timeline of experimental  
277 paradigm (top) and ethograms for the stationary and moving mouse (bottom). C) Average  
278 percentage of time spent behaving during the first separated phase of the experiment (top) and  
279 the interaction phase (bottom). Intersecting regions show concurrent whisker and forelimb  
280 movements. D) Cross-correlation of each mouse's binary behavior vectors during the interaction  
281 phase (black), compared with cross-correlation from the stationary mouse's behavior vectors  
282 during the first and second separate phases (red). Behaviors across mice during the interaction  
283 phase were significantly correlated near 0 lag. E) Intersection over union for the behavior vectors  
284 was significantly greater during the interaction phase across mice than for the behavior vectors  
285 of the two separate phases from the stationary mouse.  $p < 0.05$ ; t-test.  
286

## 287 *Global Calcium Signals Synchronize During Interaction*

288           Global signals were calculated as the spatially averaged  $\Delta F/F_0$  across the entire masked  
289 region of the two cortical hemispheres (Figure 3A-B). Global signal synchronization, measured as  
290 the Pearson's correlation coefficient (PCC) between global signals from each mouse, was  
291 significantly higher during the interaction phase (0.19 +/- 0.23 interaction phase) of the  
292 experiment than during either of the two separate phases (-0.007 +/- 0.13 before; -0.01 +/- 0.14  
293 after). (Figure 3C, repeated measures ANOVA, n=35 trials, trial-phase:  $F_{2,68} = 11.2$ ,  $p = 0.002 =$  ).  
294 Cagemate vs non-cagemate pairings did not have a significant effect on inter-brain correlation  
295 (repeated measures ANOVA,  $F_{1,34} = 6 \times 10^{-4}$ ,  $p = 0.99$ ). This increase in inter-brain correlation was  
296 not observed in experiments using the Thy1-GFP mouse line (Feng et al., 2000), suggesting that  
297 hemodynamic contributions to the fluorescence signal do not account for this synchronization  
298 (Supplemental Figure 2). Additionally, inter-brain PCCs during the interaction phase were  
299 significantly higher than PCCs observed across trial-shuffled global signal pairings during the  
300 interaction phase (Figure 3C, 0.02 +/- 0.14, n=35 correct pairs vs n=595 shuffled pairs,  $p = 1.2 \times 10^{-11}$ ,  
301  $t$ -test), suggesting that inter-brain synchronization is interaction-specific and cannot be  
302 attributed to environmental variables shared across trials e.g. timing of the stage translation. An  
303 expanded view of the interaction period from Figure 3B is shown with behavior annotations in  
304 Figure 3D. Prominent calcium events are often accompanied by sustained periods of behavior  
305 (Figure 3D) and the average  $\Delta F/F_0$  during the behavior event was positively correlated with  
306 behavior duration (Figure 3E, n=2075 behavior events,  $r = 0.44$ ,  $p < 0.001$ ). The time-varying  
307 coherence between brains revealed an increase in global signal coherence during the interaction

308 phase at frequencies below 0.2Hz (Figure 3F), suggesting that the large, low-frequency calcium  
 309 signals observed during behavior periods drive the interbrain global signal synchronization.

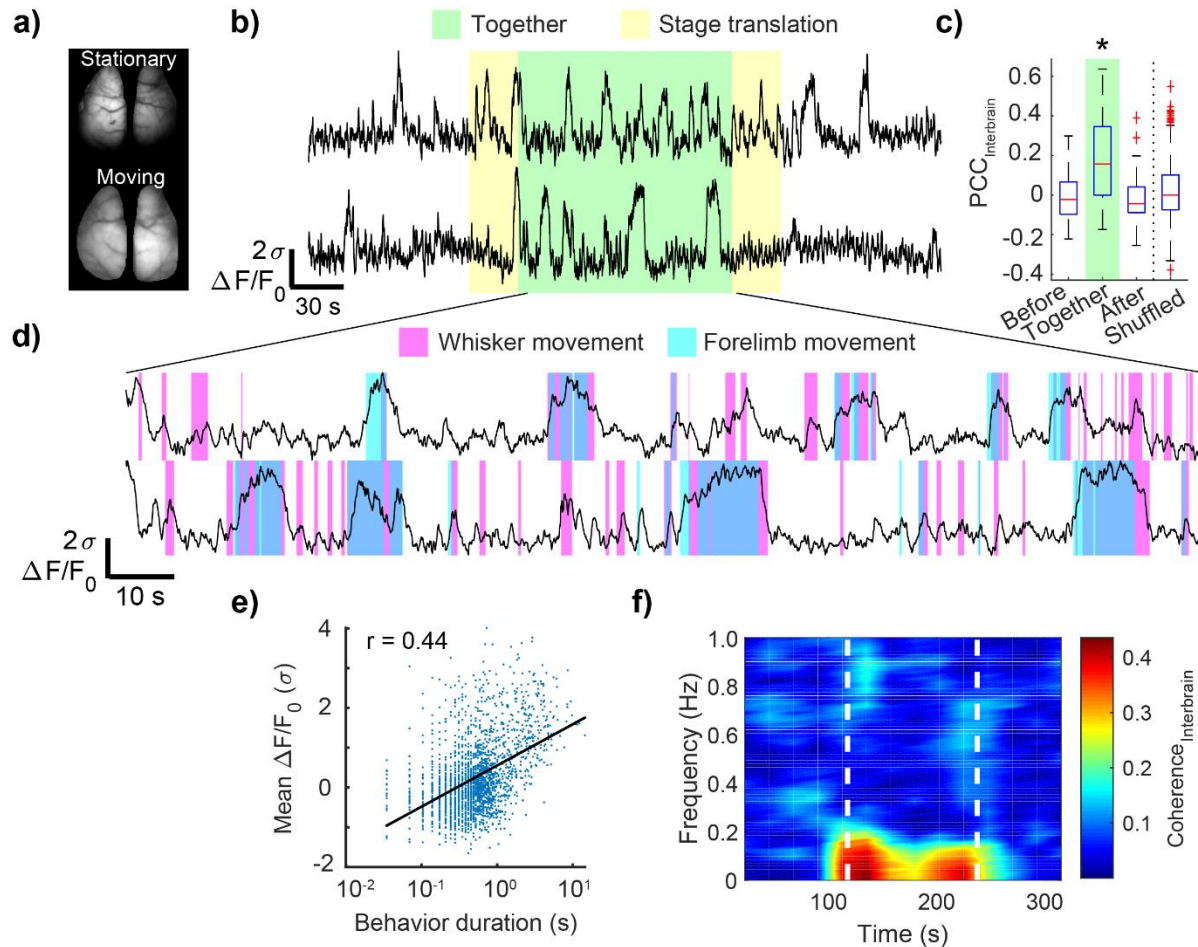

310

311 **Figure 3. Global signal synchronization during mouse interaction.** A) Example images of dorsal  
 312 cortical windows for each mouse. B) Representative example of GCaMP6s activity averaged  
 313 across the cortical mask for each mouse. C) Pearson correlation coefficients of the two global  
 314 signals were significantly greater during the interaction phase than either of the two separate  
 315 phases ( $p < 0.001$ ; repeated measures ANOVA with post-hoc Bonferroni correction for multiple  
 316 comparisons). Inter-brain correlations during interaction were significantly greater than trial-  
 317 shuffled interaction-phase pairings ( $p < 0.001$ ; t-test). D) Expanded view of global signals during  
 318 interaction phase with behavior annotations overlaid. E) Global signal  $\Delta F/F_0$  is positively  
 319 correlated with duration of behavior (Pearson correlation coefficient;  $r = 0.44$ ;  $p < 0.001$ ). F) Time-  
 320 varying inter-brain coherence, computed with a 45s window and averaged across all  
 321 experiments, shows an increase in coherence from 0-0.2Hz during the interaction phase (white  
 322 dashed lines).

323



324 *Inter-brain synchronization across multiple cortical regions during social interaction*

325 To determine whether the increase in cortex-wide inter-brain synchronization during  
326 social interaction was a global phenomenon or instead attributed to specific cortical regions, we  
327 examined inter-brain correlations on a region-by-region basis, including motor areas (vibrissae  
328 motor cortex, vM1; secondary motor cortex, M2; anterior lateral motor cortex, ALM), sensory  
329 areas (primary visual cortex, V1; forelimb, FL; hindlimb, HL, and anterior and posterior barrel  
330 cortex, aBC and pBC), retrosplenial, (RS), and parietal association area (PTA) (Figure 4A). All  
331 selected regions showed a relative increase in inter-brain correlation during the interaction  
332 period (Figure 4B-C,  $0.17 \pm 0.03$  together vs  $-0.013 \pm 0.009$  before and  $-0.019 \pm 0.02$  after  
333 interaction; repeated measures ANOVA,  $n=35$  trials,  $F_{2,18} = 53.8$ ,  $p = 8.1 \times 10^{-5}$ ), with the most  
334 dramatic increase observed from pBC. Intra-brain correlations also showed a slight but significant  
335 increase during the interaction period (Supplemental Figure 3,  $n=35$  trials,  $p < 0.05$ , repeated  
336 measures ANOVA with post-hoc Bonferroni correction).

337 Given the relatively large increase in inter-brain correlation observed from the barrel  
338 cortex areas, we wondered if shared sensory experiences during social tactile investigation could  
339 underlie the increase in inter-brain correlation. We examined self-initiated and partner-initiated  
340 whisking montages, which show cortical dynamics surrounding whisking bout initiation events.  
341 Averaged self-initiated and partner-initiated montages showed activation of the posterior barrel  
342 cortex area (Figure 4D), confirming that whisking activity elicited by either mouse can elicit barrel  
343 cortex responses in both mice (i.e. a shared sensory experience). To test if this shared sensory  
344 experience was important for establishing the inter-brain correlation, we performed experiments  
345 with physical barriers in place to prevent whisker-whisker contact between mice. Significant

346 increases in region by region inter-brain correlation were not observed when physical contact  
347 was prevented using an opaque cardboard sheet or a transparent copper mesh (Figure 4e, open  
348 trials:  $0.17 \pm 0.19$  together vs  $-0.007 \pm 0.11$  before and  $-0.005 \pm 0.11$  after interaction; repeated  
349 measures ANOVA,  $n=35$  trials,  $F_{2,68} = 13.95$ ,  $p=0.0007$ ; opaque trials:  $-0.023 \pm 1.3$  together vs -  
350  $0.024 \pm 0.09$  before and  $0.03 \pm 1.3$  after, repeated measures ANOVA,  $n=15$ ,  $F_{2,28} = 1.0$ ,  $p = 0.34$ ;  
351 mesh trials:  $0.09 \pm 0.22$  together vs  $-0.011 \pm 0.11$  before and  $-0.012 \pm 0.11$  after, repeated  
352 measures ANOVA  $n=16$ ,  $F_{2,30} = 0.022$ ,  $p = 0.88$ ). Cagemate vs non-cagemate effects were not  
353 significant (open trials:  $F_{1,34} = 3.2 \times 10^{-5}$ ,  $p = 1.0$ ; opaque trials:  $F_{1,13} = 0.62$ ,  $p = 0.45$ ; mesh trials:  
354  $F_{1,14} = 0.63$ ,  $p = 0.44$ ). Furthermore, no ultrasonic vocalizations were observed during these  
355 experiments (Supplemental Figure 4).

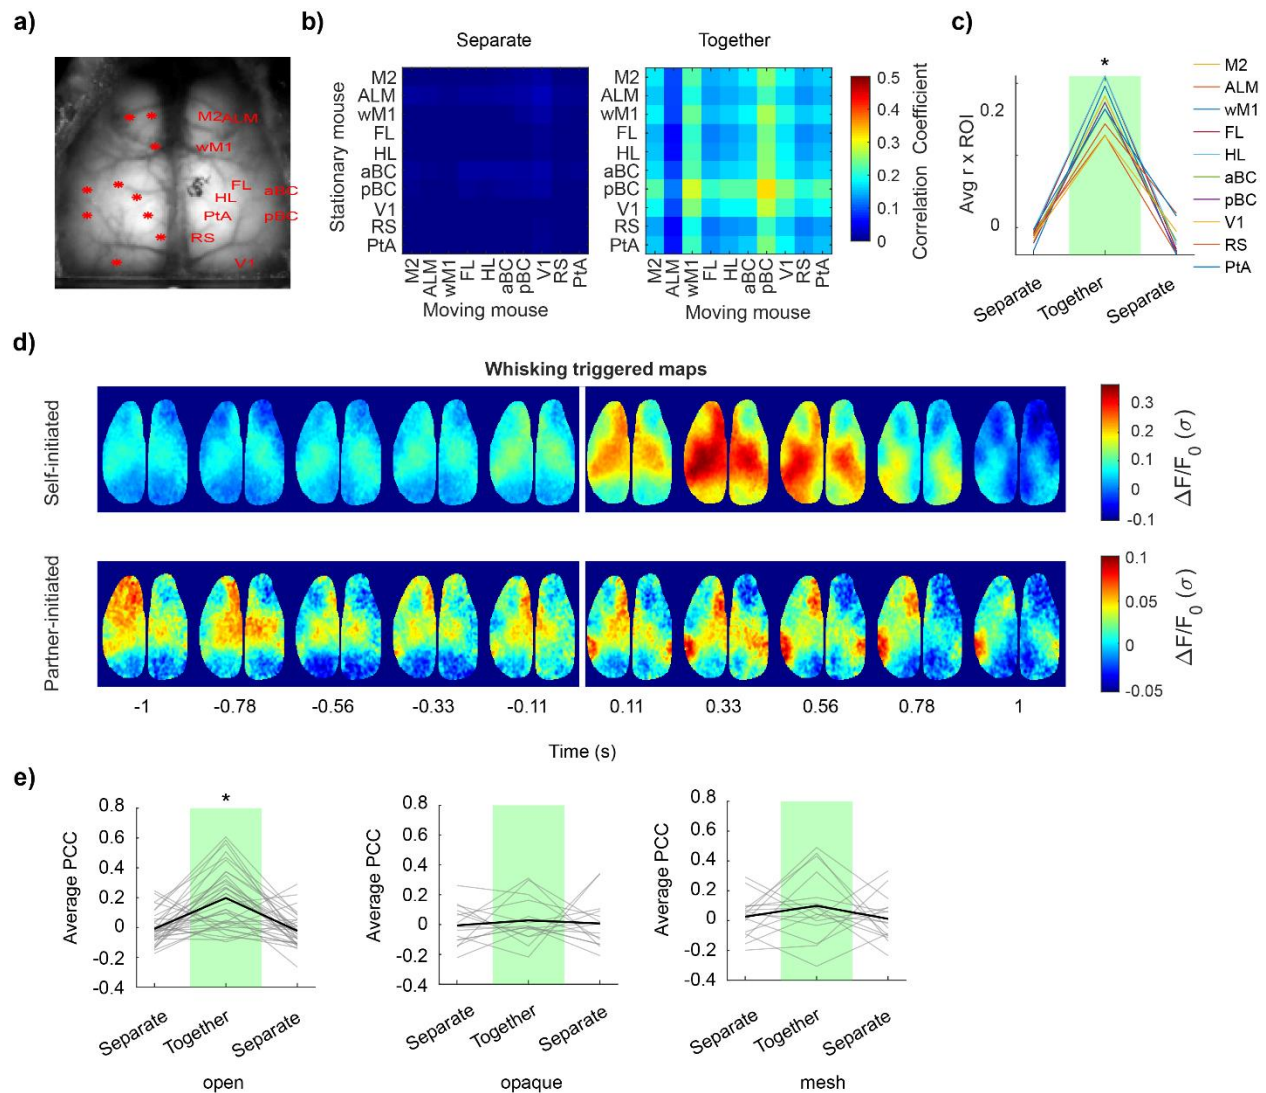

356

357 **Figure 4. Whisker contact drives multi-region inter-brain synchronization.** A) Example image of  
 358 transcranial mask with regions labelled. Abbreviations: ALM, anterior lateral motor cortex; M2,  
 359 secondary motor cortex; vM1, vibrissae motor cortex; aBC, anterior barrel cortex; pBC, posterior  
 360 barrel cortex; HL, hindlimb; FL, forelimb; PtA, lateral parietal association area; RS, retrosplenial  
 361 cortex; V1, primary visual cortex. B) Averaged inter-brain correlation matrices across all  
 362 experiments during the period before interaction (left) and the period during interaction (right).  
 363 C) Average inter-brain correlation for each region of interest against all other regions, averaged  
 364 across mice (\* $p < 0.05$ ; repeated measures ANOVA with post-hoc Bonferroni correction). Error  
 365 bars not shown for clarity. D) Example montage showing whisker movement triggered activity.  
 366 E) Averaged region-by-region correlations in each trial phase for open interaction experiments  
 367 (left,  $n=35$ ) and barrier controls (middle,  $n=15$ ; right,  $n=16$ ). Individual trials are represented by  
 368 thin grey lines, and trial averages are represented by thick black lines (\* $p < 0.001$ , repeated  
 369 measures ANOVA with post-hoc Bonferroni correction).

370

371 *Cortical activation during whisking on familiar partner is stronger than non-familiar partner*

372 To determine if partner identity has an effect on cortical activity, we examined the  
373 relationship between social rank and social novelty on cortical dynamics. Social rank differences  
374 between cagemate partners, as determined by the tube test assay, were not strongly correlated  
375 to the magnitude of global signal inter-brain synchrony at the cortex-wide scale (Figure 5A, n=14  
376 trials, Pearson's  $r=0.15$ ,  $p=0.6$ ). Similarly, no differences in inter-brain synchronization were seen  
377 when comparing interactions between cagemates vs interactions between non-cagemates  
378 (Figure 5B, cagemates n=16 trials,  $0.18 \pm 0.23$ ; non-cagemates, n=7 trials,  $0.21 \pm 0.24$ ; t-test;  
379  $p=0.66$ ). However, self-initiated whisking events produced greater global cortical activation  
380 during cagemate trials compared to non-cagemate trials (Figure 5C-E, cagemates n=40 trials,  
381  $0.09 \pm 0.19$ ; non-cagemates, n=26 trials,  $-0.07 \pm 0.23$ ;  $p=0.002$ , t-test). This difference could not  
382 be attributed to differences in the number or duration of whisking bouts (Figure F-G, number of  
383 whisking events:  $12.1 \pm 4.3$  cagemates vs  $11.3 \pm 3.4$  non-cagemates,  $p=0.4$ , t-test; duration of  
384 whisking events,  $0.27 \pm 0.08$  s cagemates vs  $0.27 \pm 0.06$ ,  $p=0.10$ , t-test).

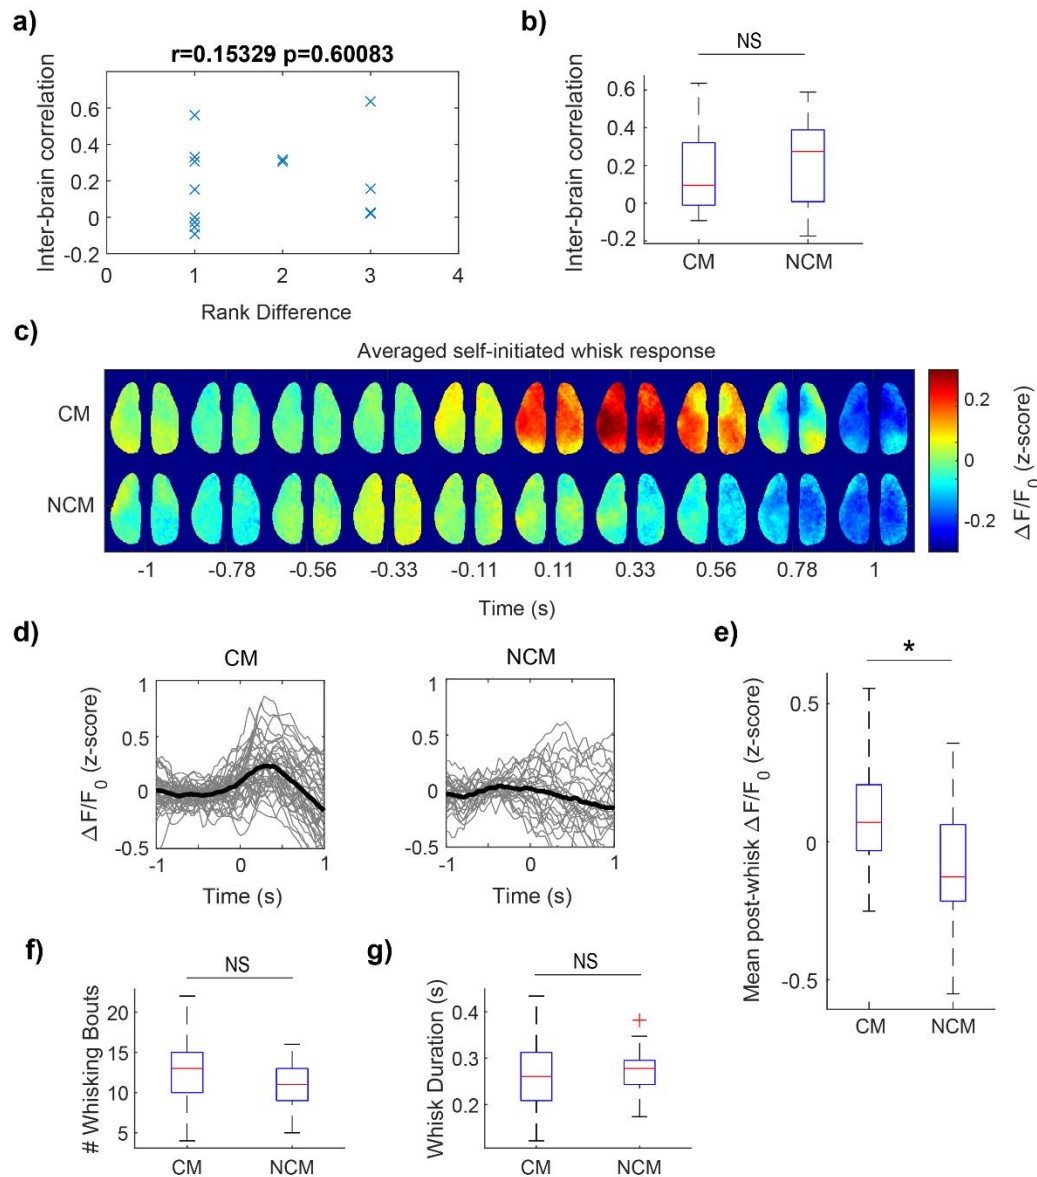

385

386 **Figure 5. Widespread cortical activation during whisking on a familiar versus novel partner. A)**

387 Inter-brain global signal correlation is not related to social rank differences between interacting

388 partners (Pearson correlation coefficient,  $r=0.15$ ). B) Inter-brain signal correlation does not

389 depend on cagemate vs non-cagemate experiments (t-test,  $p=0.66$ ). C) Self-initiated whisk

390 event triggered activation maps for cagemates and non-cagemates, averaged across all whisk

391 events per mouse then averaged across mice. D) Global signals associated with whisk-triggered

392 events for cagemates and non-cagemates. Thin gray lines show averaged global signals across

393 all whisking events per mouse. Thick black lines show average across mice. E) The mean  $\Delta F/F_0$  in

394 the 1-s post-whisk period was significantly greater in the cagemate group compared to the non-

395 cagemate group (t-test,  $p=0.005$ ). F-G) Number of whisking bouts and duration of whisking

396 bouts were not different between cagemate and non-cagemate groups.

397

## 398 Discussion

399 Our results indicate widespread correlated cortical activity between the brains of  
400 interacting mice. This synchrony is not associated with the mechanics or timing of the imaging  
401 paradigm as it was not present when trial-shuffled mouse pairs were examined. Rather, the inter-  
402 animal cortical synchronization is likely driven by temporally coordinated bouts of behavior (e.g.  
403 whisking or forelimb movements) and shared somatosensory experiences. Although previous  
404 work found that the magnitude of inter-brain synchronization may convey information regarding  
405 the social status of one of the individuals (Jiang et al., 2015; Kingsbury et al., 2019), we did not  
406 find a relationship between social rank differences and cortex-wide inter-brain synchronization.  
407 Surprisingly, we found that whisking behavior in the presence of a familiar conspecific partner  
408 elicited more pronounced cortical activation compared to whisking onto a non-familiar partner.  
409 This difference may suggest a macroscale cortical network representation of social partner  
410 identity. Future work will examine the contribution of social sensory cues on cortex-wide  
411 behavior and individual sensory circuits.

412 One limitation of the presented work is that the frame rate of the behavior camera was  
413 not fast enough to clearly resolve whisker movements. Detailed analyses of whisker movements  
414 in mice typically use camera acquisition rates of ~500fps (Mayrhofer et al., 2019; Sofroniew,  
415 Cohen, Lee, & Svoboda, 2014). It is possible that some whisking events were missed by our  
416 analyses, or the precise timing of whisk initiation was not accurately resolved. Nevertheless,  
417 whisker motion energy measurements resolved the initiation of gross whisking events, as  
418 suggested by the cortical maps displaying barrel and vibrissae motor cortex activation (Figure

419 4d); and false-negative error rates should presumably be consistent across experiments. Another  
420 limitation of the presented work is that mice must be head-restrained in order to be imaged and  
421 positioned properly. In a previous study, head-fixation was found to be aversive, but with training  
422 and habituation stress recedes (Z. V Guo et al., 2014) and rodents can even be trained to restrain  
423 themselves (Aoki, Tsubota, Goya, & Benucci, 2017; Murphy et al., 2020; Scott, Brody, & Tank,  
424 2013). For this reason, we present the results as an interaction that occurs in the context of head-  
425 fixation and caution that the observed brain dynamics may not reflect true naturalistic social  
426 touch behavior. Despite this, head-restraint facilitates consistent and reproducible interactions  
427 between animals, allowing for trial-averaging of behaviors. Recent development of a head-  
428 mounted mesoscopic camera allows for the exciting possibility to examine cortex-wide neural  
429 dynamics during more naturalistic social interactions in freely-moving mice (Rynes et al., 2020).

430 In conclusion, we introduce a dual mouse mesoscale imaging platform that can create  
431 reproducible interactions between mice that constrains some of the possible behaviors and  
432 timing due to the head-restrained and rail-based system. Such a constraint may be particularly  
433 important when evaluating the behavior of different mouse mutants associated with disorder of  
434 social interactions, such as the SHANK3 mutant mice (Peça et al., 2011). Future experiments can  
435 incorporate simultaneous electrophysiological recordings (Xiao et al., 2017) or examine lower  
436 frequency events that are revealed using functional near-infrared spectroscopy or intrinsic  
437 optical signals to draw parallels to human studies analyzing inter-subject interactions.

438

## 439 **References**

440 Allen, W. E., Chen, M. Z., Pichamoorthy, N., Tien, R. H., Pachitariu, M., Luo, L., & Deisseroth, K. (2019).

- 441 Thirst regulates motivated behavior through modulation of brainwide neural population dynamics.  
442 *Science*, 364(6437), 253. <https://doi.org/10.1126/science.aav3932>
- 443 Allen, W. E., Kauvar, I. V., Chen, M. Z., Richman, E. B., Yang, S. J., Chan, K., ... Deisseroth, K. (2017). Global  
444 Representations of Goal-Directed Behavior in Distinct Cell Types of Mouse Neocortex. *Neuron*,  
445 94(4), 891-907.e6. <https://doi.org/10.1016/j.neuron.2017.04.017>
- 446 Aoki, R., Tsubota, T., Goya, Y., & Benucci, A. (2017). An automated platform for high-throughput mouse  
447 behavior and physiology with voluntary head-fixation. *Nature Communications*.  
448 <https://doi.org/10.1038/s41467-017-01371-0>
- 449 Bobrov, E., Wolfe, J., Rao, R. P., & Brecht, M. (2014). The representation of social facial touch in rat  
450 barrel cortex. *Current Biology*. <https://doi.org/10.1016/j.cub.2013.11.049>
- 451 Bokil, H., Andrews, P., Kulkarni, J. E., Mehta, S., & Mitra, P. P. (2010). Chronux: A platform for analyzing  
452 neural signals. *Journal of Neuroscience Methods*. <https://doi.org/10.1016/j.jneumeth.2010.06.020>
- 453 Chen, P., & Hong, W. (2018). Neural Circuit Mechanisms of Social Behavior. *Neuron*.  
454 <https://doi.org/10.1016/j.neuron.2018.02.026>
- 455 Chen, T.-W., Wardill, T. J., Sun, Y., Pulver, S. R., Renninger, S. L., Baohan, A., ... Kim, D. S. (2013).  
456 Ultrasensitive fluorescent proteins for imaging neuronal activity. *Nature*, 499(7458), 295–300.  
457 <https://doi.org/10.1038/nature12354>
- 458 Clancy, K. B., Orsolich, I., & Mrsic-Flogel, T. D. (2019). Locomotion-dependent remapping of distributed  
459 cortical networks. *Nat. Neurosci.*, 22(5), 778–786. <https://doi.org/10.1038/s41593-019-0357-8>
- 460 Coffey, K. R., Marx, R. G., & Neumaier, J. F. (2019). DeepSqueak: a deep learning-based system for  
461 detection and analysis of ultrasonic vocalizations. *Neuropsychopharmacology*.  
462 <https://doi.org/10.1038/s41386-018-0303-6>
- 463 Cohen, L., Rothschild, G., & Mizrahi, A. (2011). Multisensory integration of natural odors and sounds in  
464 the auditory cortex. *Neuron*. <https://doi.org/10.1016/j.neuron.2011.08.019>
- 465 Dana, H., Chen, T.-W., Hu, A., Shields, B. C., Guo, C., Looger, L. L., ... Svoboda, K. (2014). Thy1-GCaMP6  
466 Transgenic Mice for Neuronal Population Imaging In Vivo. *PLoS One*, 9(9), e108697.  
467 <https://doi.org/10.1371/journal.pone.0108697>
- 468 Dikker, S., Wan, L., Davidesco, I., Kaggen, L., Oostrik, M., McClintock, J., ... Poeppel, D. (2017). Brain-to-  
469 Brain Synchrony Tracks Real-World Dynamic Group Interactions in the Classroom. *Current Biology*.  
470 <https://doi.org/10.1016/j.cub.2017.04.002>
- 471 Dölen, G., Darvishzadeh, A., Huang, K. W., & Malenka, R. C. (2013). Social reward requires coordinated  
472 activity of nucleus accumbens oxytocin and serotonin. *Nature*.  
473 <https://doi.org/10.1038/nature12518>
- 474 Ebbesen, C. L., Bobrov, E., Rao, R. P., & Brecht, M. (2019). Highly structured, partner-sex- and subject-  
475 sex-dependent cortical responses during social facial touch. *Nature Communications*.  
476 <https://doi.org/10.1038/s41467-019-12511-z>
- 477 Fan, Z., Zhu, H., Zhou, T., Wang, S., Wu, Y., & Hu, H. (2019). Using the tube test to measure social  
478 hierarchy in mice. *Nat. Protoc.*, 14(3), 819–831. <https://doi.org/10.1038/s41596-018-0116-4>
- 479 Feng, G., Mellor, R. H., Bernstein, M., Keller-Peck, C., Nguyen, Q. T., Wallace, M., ... Sanes, J. R. (2000).



- 480 Imaging neuronal subsets in transgenic mice expressing multiple spectral variants of GFP. *Neuron*,  
481 28(1), 41–51. Retrieved from <https://www.ncbi.nlm.nih.gov/pubmed/11086982>
- 482 Funane, T., Kiguchi, M., Atsumori, H., Sato, H., Kubota, K., & Koizumi, H. (2011). Synchronous activity of  
483 two people's prefrontal cortices during a cooperative task measured by simultaneous near-infrared  
484 spectroscopy. *J. Biomed. Opt.*, 16(7), 77011. <https://doi.org/10.1117/1.3602853>
- 485 Gilad, A., & Helmchen, F. (2020). Spatiotemporal refinement of signal flow through association cortex  
486 during learning. *Nat. Commun.*, 11(1), 1744. <https://doi.org/10.1038/s41467-020-15534-z>
- 487 Gunaydin, L. A., Grosenick, L., Finkelstein, J. C., Kauvar, I. V., Fenno, L. E., Adhikari, A., ... Deisseroth, K.  
488 (2014). Natural neural projection dynamics underlying social behavior. *Cell*.  
489 <https://doi.org/10.1016/j.cell.2014.05.017>
- 490 Guo, B., Chen, J., Chen, Q., Ren, K., Feng, D., Mao, H., ... Wu, S. (2019). Anterior cingulate cortex  
491 dysfunction underlies social deficits in Shank3 mutant mice. *Nat. Neurosci.*, 22(8), 1223–1234.  
492 <https://doi.org/10.1038/s41593-019-0445-9>
- 493 Guo, Z. V., Li, N., Huber, D., Ophir, E., Gutnisky, D., Ting, J. T., ... Svoboda, K. (2014). Flow of cortical  
494 activity underlying a tactile decision in mice. *Neuron*, 81(1), 179–194.  
495 <https://doi.org/10.1016/j.neuron.2013.10.020>
- 496 Jiang, J., Chen, C., Dai, B., Shi, G., Ding, G., Liu, L., & Lu, C. (2015). Leader emergence through  
497 interpersonal neural synchronization. *Proceedings of the National Academy of Sciences*.  
498 <https://doi.org/10.1073/pnas.1422930112>
- 499 Kingsbury, L., Huang, S., Raam, T., Ye, L. S., Wei, D., Hu, R. K., ... Hong, W. (2020). Cortical  
500 Representations of Conspecific Sex Shape Social Behavior. *Neuron*.  
501 <https://doi.org/10.1016/j.neuron.2020.06.020>
- 502 Kingsbury, L., Huang, S., Wang, J., Gu, K., Golshani, P., Wu, Y. E., & Hong, W. (2019). Correlated Neural  
503 Activity and Encoding of Behavior across Brains of Socially Interacting Animals. *Cell*.  
504 <https://doi.org/10.1016/j.cell.2019.05.022>
- 505 Kluyver, T., Ragan-Kelley, B., Pérez, F., Granger, B. E., Bussonnier, M., Frederic, J., ... Others. (2016).  
506 Jupyter Notebooks—a publishing format for reproducible computational workflows. *ELPUB*.  
507 Retrieved from  
508 [https://books.google.com/books?hl=en&lr=&id=Lgy3DAAAQBAJ&oi=fnd&pg=PA87&dq=kluuyver+2](https://books.google.com/books?hl=en&lr=&id=Lgy3DAAAQBAJ&oi=fnd&pg=PA87&dq=kluuyver+2016+Jupyter&ots=N1AX7LqGbm&sig=_iRTIQYM8bahTMPNiqSV-dE9JKE)  
509 [016+Jupyter&ots=N1AX7LqGbm&sig=\\_iRTIQYM8bahTMPNiqSV-dE9JKE](https://books.google.com/books?hl=en&lr=&id=Lgy3DAAAQBAJ&oi=fnd&pg=PA87&dq=kluuyver+2016+Jupyter&ots=N1AX7LqGbm&sig=_iRTIQYM8bahTMPNiqSV-dE9JKE)
- 510 Lenschow, C., & Brecht, M. (2015). Barrel Cortex Membrane Potential Dynamics in Social Touch. *Neuron*.  
511 <https://doi.org/10.1016/j.neuron.2014.12.059>
- 512 Li, Y., Mathis, A., Grewe, B. F., Osterhout, J. A., Ahanonu, B., Schnitzer, M. J., ... Dulac, C. (2017).  
513 Neuronal Representation of Social Information in the Medial Amygdala of Awake Behaving Mice.  
514 *Cell*. <https://doi.org/10.1016/j.cell.2017.10.015>
- 515 Liu, Y., Piazza, E. A., Simony, E., Shewokis, P. A., Onaral, B., Hasson, U., & Ayaz, H. (2017). Measuring  
516 speaker-listener neural coupling with functional near infrared spectroscopy. *Sci. Rep.*, 7, 43293.  
517 <https://doi.org/10.1038/srep43293>
- 518 Ma, Y., Shaik, M. A., Kim, S. H., Kozberg, M. G., Thibodeaux, D. N., Zhao, H. T., ... Hillman, E. M. C. (2016).  
519 Wide-field optical mapping of neural activity and brain haemodynamics: considerations and novel

- 520 approaches. *Philos. Trans. R. Soc. Lond. B Biol. Sci.*, 371(1705).  
521 <https://doi.org/10.1098/rstb.2015.0360>
- 522 MacDowell, C. J., & Buschman, T. J. (2020). Low-Dimensional Spatiotemporal Dynamics Underlie Cortex-  
523 wide Neural Activity. *Current Biology*. <https://doi.org/10.1016/j.cub.2020.04.090>
- 524 Mayrhofer, J. M., El-Boustani, S., Foustoukos, G., Auffret, M., Tamura, K., & Petersen, C. C. H. (2019).  
525 Distinct Contributions of Whisker Sensory Cortex and Tongue-Jaw Motor Cortex in a Goal-Directed  
526 Sensorimotor Transformation. *Neuron*, 103(6), 1034-1043.e5.  
527 <https://doi.org/10.1016/j.neuron.2019.07.008>
- 528 Mitra, P., & Bokil, H. (2009). *Observed Brain Dynamics*. *Observed Brain Dynamics*.  
529 <https://doi.org/10.1093/acprof:oso/9780195178081.001.0001>
- 530 Montague, P. R., Berns, G. S., Cohen, J. D., McClure, S. M., Pagnoni, G., Dhamala, M., ... Fisher, R. E.  
531 (2002). Hyperscanning: simultaneous fMRI during linked social interactions. *Neuroimage*, 16(4),  
532 1159–1164. <https://doi.org/10.1006/nimg.2002.1150>
- 533 Murphy, T. H., Michelson, N. J., Boyd, J. D., Fong, T., Bolaños, L. A., Bierbrauer, D., ... Ledue, J. M. (2020).  
534 Automated task training and longitudinal monitoring of mouse mesoscale cortical circuits using  
535 home cages. *ELife*. <https://doi.org/10.7554/eLife.55964>
- 536 Musall, S., Kaufman, M. T., Juavinett, A. L., Gluf, S., & Churchland, A. K. (2019). Single-trial neural  
537 dynamics are dominated by richly varied movements. *Nature Neuroscience*.  
538 <https://doi.org/10.1038/s41593-019-0502-4>
- 539 Peça, J., Feliciano, C., Ting, J. T., Wang, W., Wells, M. F., Venkatraman, T. N., ... Feng, G. (2011). Shank3  
540 mutant mice display autistic-like behaviours and striatal dysfunction. *Nature*, 472(7344), 437–442.  
541 <https://doi.org/10.1038/nature09965>
- 542 Pinto, L., Rajan, K., DePasquale, B., Thiberge, S. Y., Tank, D. W., & Brody, C. D. (2019). Task-Dependent  
543 Changes in the Large-Scale Dynamics and Necessity of Cortical Regions. *Neuron*.  
544 <https://doi.org/10.1016/j.neuron.2019.08.025>
- 545 Rogers-Carter, M. M., Varela, J. A., Gribbons, K. B., Pierce, A. F., McGoey, M. T., Ritchey, M., &  
546 Christianson, J. P. (2018). Insular cortex mediates approach and avoidance responses to social  
547 affective stimuli. *Nature Neuroscience*. <https://doi.org/10.1038/s41593-018-0071-y>
- 548 Rynes, M., Surinach, D., Laroque, M., Linn, S., Dominguez, J., Ghanbari, L., & Kodandaramaiah, S. (2020).  
549 Miniaturized device for whole cortex mesoscale imaging in freely behaving mice. *Neural Imaging  
550 and Sensing 2020*. <https://doi.org/10.1117/12.2550395>
- 551 Scott, B. B., Brody, C. D., & Tank, D. W. (2013). Cellular resolution functional imaging in behaving rats  
552 using voluntary head restraint. *Neuron*, 80(2), 371–384.  
553 <https://doi.org/10.1016/j.neuron.2013.08.002>
- 554 Silasi, G., Xiao, D., Vanni, M. P., Chen, A. C. N., & Murphy, T. H. (2016). Intact skull chronic windows for  
555 mesoscopic wide-field imaging in awake mice. *Journal of Neuroscience Methods*.  
556 <https://doi.org/10.1016/j.jneumeth.2016.04.012>
- 557 Sofroniew, N. J., Cohen, J. D., Lee, A. K., & Svoboda, K. (2014). Natural whisker-guided behavior by head-  
558 fixed mice in tactile virtual reality. *Journal of Neuroscience*, 34(29), 9537–9550. Retrieved from  
559 <https://www.jneurosci.org/content/34/29/9537/>

- 560 Steinmetz, N. A., Zatzka-Haas, P., Carandini, M., & Harris, K. D. (2019). Distributed coding of choice, action  
561 and engagement across the mouse brain. *Nature*, *576*(7786), 266–273.  
562 <https://doi.org/10.1038/s41586-019-1787-x>
- 563 Sych, Y., Chernysheva, M., Sumanovski, L. T., & Helmchen, F. (n.d.). High-density multi-fiber photometry  
564 for studying large-scale brain circuit dynamics. <https://doi.org/10.1101/422857>
- 565 Tschida, K., Michael, V., Takatoh, J., Han, B.-X., Zhao, S., Sakurai, K., ... Wang, F. (2019). A Specialized  
566 Neural Circuit Gates Social Vocalizations in the Mouse. *Neuron*, *103*(3), 459-472.e4.  
567 <https://doi.org/10.1016/j.neuron.2019.05.025>
- 568 Valley, M. T., Moore, M. G., Zhuang, J., Mesa, N., Castelli, D., Sullivan, D., ... Waters, J. (2020). Separation  
569 of hemodynamic signals from GCaMP fluorescence measured with wide-field imaging. *Journal of*  
570 *Neurophysiology*. <https://doi.org/10.1152/JN.00304.2019>
- 571 Vanni, M. P., Chan, A. W., Balbi, M., Silasi, G., & Murphy, T. H. (2017). Mesoscale Mapping of Mouse  
572 Cortex Reveals Frequency-Dependent Cycling between Distinct Macroscale Functional Modules. *J.*  
573 *Neurosci.*, *37*(31), 7513–7533. <https://doi.org/10.1523/jneurosci.3560-16.2017>
- 574 Vanni, M. P., & Murphy, T. H. (2014). Mesoscale transcranial spontaneous activity mapping in GCaMP3  
575 transgenic mice reveals extensive reciprocal connections between areas of somatomotor cortex. *J.*  
576 *Neurosci.*, *34*(48), 15931–15946. <https://doi.org/10.1523/JNEUROSCI.1818-14.2014>
- 577 Walsh, J. J., Christoffel, D. J., Heifets, B. D., Ben-Dor, G. A., Selimbeyoglu, A., Hung, L. W., ... Malenka, R.  
578 C. (2018). 5-HT release in nucleus accumbens rescues social deficits in mouse autism model.  
579 *Nature*. <https://doi.org/10.1038/s41586-018-0416-4>
- 580 Wang, F., Zhu, J., Zhu, H., Zhang, Q., Lin, Z., & Hu, H. (2011). Bidirectional control of social hierarchy by  
581 synaptic efficacy in medial prefrontal cortex. *Science*. <https://doi.org/10.1126/science.1209951>
- 582 Wekselblatt, J. B., Flister, E. D., Piscopo, D. M., & Niell, C. M. (2016). Large-scale imaging of cortical  
583 dynamics during sensory perception and behavior. *Journal of Neurophysiology*.  
584 <https://doi.org/10.1152/jn.01056.2015>
- 585 Xiao, D., Vanni, M. P., Mitelut, C. C., Chan, A. W., Ledue, J. M., Xie, Y., ... Murphy, T. H. (2017). Mapping  
586 cortical mesoscopic networks of single spiking cortical or sub-cortical neurons. *ELife*.  
587 <https://doi.org/10.7554/eLife.19976>
- 588 Yang, J., Zhang, H., Ni, J., De Dreu, C. K. W., & Ma, Y. (2020). Within-group synchronization in the  
589 prefrontal cortex associates with intergroup conflict. *Nature Neuroscience*.  
590 <https://doi.org/10.1038/s41593-020-0630-x>
- 591 Zhang, W., & Yartsev, M. M. (2019). Correlated Neural Activity across the Brains of Socially Interacting  
592 Bats. *Cell*. <https://doi.org/10.1016/j.cell.2019.05.023>
- 593 Zhou, T., Zhu, H., Fan, Z., Wang, F., Chen, Y., Liang, H., ... Hu, H. (2017). History of winning remodels  
594 thalamo-PFC circuit to reinforce social dominance. *Science*, *357*(6347), 162–168.  
595 <https://doi.org/10.1126/science.aak9726>
- 596
- 597

**Table 1: Parts List for Social Interaction System**

| <b><u>Description</u></b>                                   | <b><u>#</u></b> | <b><u>Manufacturer</u></b> | <b><u>Part Number</u></b> |
|-------------------------------------------------------------|-----------------|----------------------------|---------------------------|
| Aluminum Breadboard 18" x 24" x 1/2", 1/4"-20 Taps          | 1               | Thorlabs                   | MB1824                    |
| Ø1" Pillar Posts with 1/4"-20 Taps, 2"                      | 4               | Thorlabs                   | RS2                       |
| Ø1" Pillar Posts with 1/4"-20 Taps, 3"                      | 8               | Thorlabs                   | RS3                       |
| Ø1" Pillar Posts with 1/4"-20 Taps, 6"                      | 8               | Thorlabs                   | RS6                       |
| Clamping Fork, 1.24" Counterbored Slot, Universal           | 4               | Thorlabs                   | CF125                     |
| Ø1/2" Pedestal Post Holder                                  | 3               | Thorlabs                   | PH2E                      |
| Ø1/2" Optical Post, SS, 8-32 Setscrew, 1/4"-20 Tap, L = 8"  | 3               | Thorlabs                   | TR8                       |
| Ø1/2" Optical Post, SS, 8-32 Setscrew, 1/4"-20 Tap, L = 12" | 1               | Thorlabs                   | TR12                      |
| Right-Angle Clamp for Ø1/2" Posts, 3/16" Hex                | 2               | Thorlabs                   | RA90                      |
| Ø25 mm Post Spacer, Thickness = 3 mm                        | 1               | Thorlabs                   | RS3M                      |
| RPi Camera (F), Supports Night Vision, Adjustable-Focus     | 2               | Waveshare                  | 10299                     |
| Flex Cable for Raspberry Pi Camera or Display - 2 meters    | 2               | Adafruit                   | 2144                      |
| <b>Triple Light Guide and Imaging Parts</b>                 |                 |                            |                           |
| Triple Bandpass Filter (camera)                             | 1               | Chroma                     | 69013m                    |
| Liquid Light Guide                                          | 1               | Thorlabs                   | LLG0338-4                 |
| SM1 Adapter for Liquid Light Guide                          | 1               | Thorlabs                   | AD3LLG                    |
| SM1 Lens Tube, 3.00" Thread Depth                           | 3               | Thorlabs                   | SM1L30                    |
| SM1 Lens Tube, 1.00" Thread Depth                           | 3               | Thorlabs                   | SM1L10                    |
| SM1 Lens Tube, 2.00" Thread Depth                           | 1               | Thorlabs                   | SM1L20                    |
| SM1 Retaining Rings                                         | 2               | Thorlabs                   | SM1RR-P10                 |
| Dichroic Cage Cube                                          | 2               | Thorlabs                   | CM1-DC                    |
| Cage Cube Connector                                         | 1               | Thorlabs                   | CM1-CC                    |
| Compact Clamp with Variable Height                          | 1               | Thorlabs                   | CL3                       |
| Bi-Convex Lens                                              | 4               | Thorlabs                   | LB1761                    |
| AT455DC Size: 26 * 38 mm                                    | 1               | Chroma                     | AT455DC                   |
| 25 mm x 36 mm Longpass Dichroic Mirror, 550 nm Cutoff       | 1               | Thorlabs                   | DMLP550R                  |
| Ø1" Bandpass Filter, CWL = 620 ± 2 nm, FWHM = 10 ± 2 nm     | 1               | Thorlabs                   | FB620-10                  |
| ET480/30x Size: 25mmR R=Mounted in Ring                     | 1               | Chroma                     | ET480/30x                 |

|                                                                 |   |             |          |
|-----------------------------------------------------------------|---|-------------|----------|
| Ø1" Bandpass Filter, CWL = $440 \pm 2$ nm, FWHM = $10 \pm 2$ nm | 1 | Thorlabs    | FB440-10 |
| Royal-Blue (448nm) Rebel LED                                    | 1 | Luxeon Star | SP-01-V4 |
| Blue (470nm) Rebel LED                                          | 1 | Luxeon Star | SP-01-B6 |
| Red-Orange (617nm) Rebel LED                                    | 1 | Luxeon Star | SP-01-E6 |

**Machined Parts (Stainless Steel)**

|                                         |   |
|-----------------------------------------|---|
| Milled as-1.50_2_v2.SLDPRT              | 3 |
| Spacer_with_wire_hole_as-.500_v2.SLDPRT | 3 |
| LED_mount_as-1.50_v2.SLDPRT             | 3 |

**3D Printed Parts (Black PLA)**

|                              |   |
|------------------------------|---|
| TripleLEDLightGuide_Base.stl | 1 |
| Light_Guide_Mount_V2.stl     | 1 |
